# Supplementary material for: Microarray analysis of signalling interactions between inflammation and angiogenesis in subchondral bone in temporomandibular joint osteoarthritis
Source: PubMed Central journal article supplement — Biomater Transl. 2024 Jun 28;5(2):175–84. doi: 10.12336/biomatertransl.2024.02.007 (PMC11438608; doi:10.12336/biomatertransl.2024.02.007), 2024-06-28
Supplement: bt-05-02-175-s001.pdf [file bt-05-02-175-s001.pdf]

**Additional Table 1. Primer sequences used for quantitative real-time polymerase chain reaction in the present study**

| <b>Gene</b>                                                            | <b>Sequence (5'-3')</b>                                                         |
|------------------------------------------------------------------------|---------------------------------------------------------------------------------|
| Phosphatidylinositol-4,5-bisphosphate 3-kinase catalytic subunit delta | Forward: TCC CCT TCA TTC TCA CCT ACG<br>Reverse: CGG AAC CTT TCA AAC TTC TCA CT |
| Cathelicidin antimicrobial peptide                                     | Forward: ACC AGC AGT CCC TAG ACA CCA<br>Reverse: CTC CTT CAC TCG GAA CCT CAC    |
| C-X-C motif chemokine receptor 4                                       | Forward: ACC TCT ACA GCA GCG TTC TCA T<br>Reverse: TGG TGG CGT GGA CAA TAG C    |
| MYB proto-oncogene, transcription factor                               | Forward: CCT ATC CTG TCG CAT TGC AT<br>Reverse: TTC TCA GGG TCT TCG TCG TTA T   |

**Additional Table 2. Representative differentially expressed genes with known or suspected roles in inflammation**

| <b>Gene symbol</b> | <b>Description</b>                                        | <b>P-value</b> | <b>Fold change</b> | <b>Up/down-regulation</b> |
|--------------------|-----------------------------------------------------------|----------------|--------------------|---------------------------|
| <i>BCL11A</i>      | B cell CLL/lymphoma 11A                                   | 0.0243         | 4.1625             | Up                        |
| <i>BTK</i>         | Bruton agammaglobulinemia tyrosine kinase                 | 0.0285         | 4.3301             | Up                        |
| <i>CAMP</i>        | Cathelicidin antimicrobial peptide                        | 0.0413         | 7.9126             | Up                        |
| <i>CD19</i>        | CD19 antigen                                              | 0.0014         | 3.5259             | Up                        |
| <i>CD22</i>        | CD22 antigen                                              | 0.0385         | 2.9035             | Up                        |
| <i>CD37</i>        | CD37 antigen                                              | 0.022          | 3.8764             | Up                        |
| <i>CD79A</i>       | CD79A antigen (immunoglobulin-associated alpha)           | 0.0044         | 2.7651             | Up                        |
| <i>CD79B</i>       | CD79B antigen                                             | 0.0218         | 4.5229             | Up                        |
| <i>CXCR4</i>       | Chemokine (C-X-C motif) receptor 4                        | 0.0082         | 3.5457             | Up                        |
| <i>DOCK8</i>       | Adult male thymus cDNA                                    | 0.0393         | 2.5315             | Up                        |
| <i>E2F2</i>        | E2F transcription factor 2                                | 0.0421         | 4.3995             | Up                        |
| <i>ELANE</i>       | Elastase                                                  | 0.0465         | 14.2298            | Up                        |
| <i>FFAR2</i>       | Free fatty acid receptor 2                                | 0.0254         | 5.8122             | Up                        |
| <i>IGHM</i>        | Immunoglobulin heavy chain 6                              | 0.0175         | 4.3101             | Up                        |
| <i>IKZF3</i>       | IKAROS family zinc finger 3                               | 0.0015         | 5.3701             | Up                        |
| <i>IRF4</i>        | Interferon regulatory factor 4                            | 0.0448         | 4.1317             | Up                        |
| <i>IRF8</i>        | Interferon regulatory factor 8                            | 0.046          | 2.9861             | Up                        |
| <i>KLRA7</i>       | Killer cell lectin-like receptor, subfamily A, member 7   | 0.0346         | 4.8636             | Up                        |
| <i>LY6D</i>        | Lymphocyte antigen 6 complex, locus D                     | 0.0117         | 4.7527             | Up                        |
| <i>MPO</i>         | Myeloperoxidase                                           | 0.0449         | 11.1979            | Up                        |
| <i>MS4A1</i>       | Membrane-spanning 4-domains, subfamily A, member 1        | 0.0128         | 5.4576             | Up                        |
| <i>MYB</i>         | Myeloblastosis oncogene                                   | 0.0263         | 3.804              | Up                        |
| <i>MZB1</i>        | Marginal zone B and B1 cell-specific protein 1            | 0.0362         | 3.9208             | Up                        |
| <i>NCKAP1L</i>     | NCK associated protein 1 like                             | 0.0469         | 2.1408             | Up                        |
| <i>PIK3CD</i>      | Phosphatidylinositol 3-kinase catalytic delta polypeptide | 0.0398         | 2.1535             | Up                        |
| <i>RASGRP1</i>     | RAS guanyl releasing protein 1                            | 0.0309         | 2.2987             | Up                        |
| <i>RHOH</i>        | Ras homolog gene family, member H                         | 0.0358         | 3.1159             | Up                        |
| <i>SIGLECG</i>     | Sialic acid binding Ig-like lectin G                      | 0.0162         | 3.7754             | Up                        |
| <i>SPIB</i>        | Spi-B transcription factor (Spi-1/PU.1 related)           | 0.0273         | 5.4265             | Up                        |
| <i>STAP1</i>       | Signal transducing adaptor family member 1                | 0.0499         | 6.0973             | Up                        |
| <i>TNFRSF13B</i>   | Tumor necrosis factor receptor superfamily, member 13b    | 0.0486         | 3.1712             | Up                        |
| <i>TNFRSF13C</i>   | Tumor necrosis factor receptor superfamily, member 13c    | 0.0087         | 4.5224             | Up                        |
| <i>TNFRSF17</i>    | Tumor necrosis factor receptor superfamily, member 17     | 0.016          | 2.4257             | Up                        |
| <i>TRIM12C</i>     | Tripartite motif-containing 12C                           | 0.0265         | 2.3185             | Up                        |
| <i>VPREB3</i>      | Pre-B lymphocyte gene 3                                   | 0.0445         | 4.3671             | Up                        |
| <i>WDFY4</i>       | WD repeat and FYVE domain containing 4                    | 0.0484         | 3.2119             | Up                        |

**Additional Table 3. Representative differentially expressed genes with known or suspected roles in angiogenesis**

| <b>Gene symbol</b> | <b>Description</b>                                        | <b>P-value</b> | <b>Fold change</b> | <b>Up/down-regulation</b> |
|--------------------|-----------------------------------------------------------|----------------|--------------------|---------------------------|
| <i>BTK</i>         | Bruton agammaglobulinemia tyrosine kinase                 | 0.0285         | 4.3301             | Up                        |
| <i>CFL1</i>        | Cofilin 1                                                 | 0.0477         | 2.1187             | Up                        |
| <i>CXCR4</i>       | Chemokine (C-X-C motif) receptor 4                        | 0.0082         | 3.5457             | Up                        |
| <i>FFAR2</i>       | Free fatty acid receptor 2                                | 0.0254         | 5.8122             | Up                        |
| <i>H2AFX</i>       | H2A histone family, member X                              | 0.0499         | 2.5043             | Up                        |
| <i>LY6D</i>        | Lymphocyte antigen 6 complex, locus D                     | 0.0117         | 4.7527             | Up                        |
| <i>MYB</i>         | Myeloblastosis oncogene                                   | 0.0263         | 3.804              | Up                        |
| <i>PIK3CD</i>      | Phosphatidylinositol 3-kinase catalytic delta polypeptide | 0.0398         | 2.1535             | Up                        |
| <i>RASGRP1</i>     | RAS guanyl releasing protein 1                            | 0.0309         | 2.2987             | Up                        |
| <i>CD19</i>        | CD19 antigen                                              | 0.0014         | 3.5259             | Up                        |
| <i>RTKN2</i>       | Rhotekin 2                                                | 0.0365         | 3.8247             | Up                        |
| <i>IKZF3</i>       | IKAROS family zinc finger 3                               | 0.0015         | 5.3701             | Up                        |
| <i>IRF4</i>        | Interferon regulatory factor 4                            | 0.0448         | 4.1317             | Up                        |
| <i>UBD</i>         | Ubiquitin D                                               | 0.0288         | 4.791              | Up                        |
| <i>CAMP</i>        | Cathelicidin antimicrobial peptide                        | 0.0413         | 7.9126             | Up                        |
| <i>ISG20</i>       | Interferon-stimulated protein                             | 0.0307         | 3.1225             | Up                        |
| <i>MPO</i>         | Myeloperoxidase                                           | 0.0449         | 11.1979            | Up                        |
| <i>SPIB</i>        | Spi-B transcription factor                                | 0.0273         | 5.4265             | Up                        |

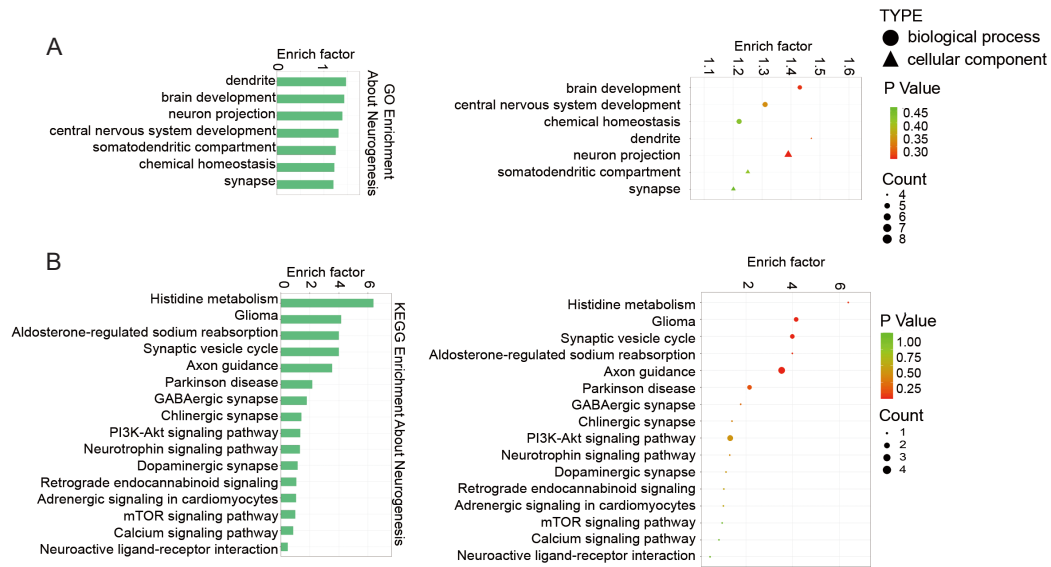

**Additional Figure 1.** Functional enrichment analyses of DEGs associated with neurogenesis. (A) GO term categorisation. (B) KEGG pathway mapping. DEG: differentially expressed gene; GO: Gene Ontology; KEGG: Kyoto Encyclopedia of Genes and Genomes.
